# Supplementary material
Source: PubMed Central journal article supplement (PMC3494180)
Supplement: supp_M112.019844_mcp.M112.019844-1.pdf [file supp_M112.019844_mcp.M112.019844-1.pdf]

39926 YLSIPLVPHSCTELVLVKMNPVFAVIAVQAIKPNYK**SQFEAFSD**ELIRYVNEESGA 60  
39928 -----VLIRMNWL LTFAAIAVVQAAR-----LDPFSDQLIQYVNEQSGA 39  
\*\*.:\*\*\* :.\*.\*\*\*\*\* : :.\*\*\*:\*.\*\*\*\*\*:\*\*\*

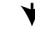

39926 TWKAAR**SAQFN**SI**EQFK**VHLGALAETPEQRISRPTIK**HHVSAN**DL**PESFDARNQ**WPHCS 120  
39928 SWKAAPSTRFNSMEHFKQHLGALLETPEQRQSRPTVTHQVSDK**DLPE**S**FDARKQ**WPHCP 99  
:\*\*\*\* \*:.:\*\*\*:\*.\*\* \*\*\*\*\* \*\*\*\*\* \*\*\*\*\*:.\*:\*\* :\*\*\*\*\*.\*\*\*\*\*.

39926 **SIPEIRDQASCG**SCWATA**AVSAMS**DRVCIHSNGKITPRL**STMDPL**TCCT**NCGNGC**GGYP 180  
39928 **SISEIRDQSSCG**SCWAFGAVEAMSDRVCIHSNG**QMKPHLS**ARDLTS**CCGICG**FGCEGGYP 159  
\*.\*.\*\*\*\*\*:\*\*\*\*\*.\*.\*.\*\*\*\*\*:..\*:\*\*: \* :\*\* \*\* \*\*:\*\*\*\*\*

39926 PKAWDYWK**SEGV**TGGT**WENRTGC**Q**PFIFAK**CDHVGNSRKY**PPCPHSI**YPT**PPCAK**TCQT 240  
39928 SVAWDYWATTGIVTGG**SLEE**Q**TGCM**PYP**FPKCA**HQRF**TNGLKPC**PKELYPT**PTCER**SCQE 219  
. \*\*\*\*\* : \*:\*\*\*\*\*: \*:\*\* \*\* :\*.\*\* \* :. \*\*\*:..\*\*\*\*\*.\* ::\*\*

39926 GYNK**TFEEDK**FGNSSYN**VDAHES**NI**MYEIMK**NG**PVEAS**F**VFTDF**S**VYRSGI**YHHVYGG 300  
39928 GYNK**TYDEDK**FY**AKT**SYN**VDENEK**DI**MYEIVK**NG**PVEAG**FMVYED**FFVYK**SGVYHHVSGG 279  
\*\*\*\*\*:.\*\*\*\*\*\*.:.\*\*\*\*\*\* :\*.:\*\*\*\*\*:\*\*\*\*\*.\*:\*\*: \*\* \*\*\*:\*\*:\*\*\*\*\* \*\*

39926 **PVGR**HAI**RVIGW**GV**EDG**VPY**WLMAN**SWNE**EWGEN**GY**FRIKRGM**NE**CGIET**EV**VAGMP**RL 359  
39928 **FLGG**HAI**RI**L**GWV**ENG**VKY**WLIANSWNE**GWGEN**GY**FRMR**R**GNDEC**GI**ESM**V**TAGM**RL 338  
:\* \*\*\*\*\*:.\*\*\*\*\*\*:\*.\*\* \*\*\*\*\* \*\*\*\*\*:..\*:\*\* :\*\*\*\*\*:\*.\*\*\*\*\*
